# Supplementary material
Source: ML conference proceedings conference paper supplement (https://openreview.net/forum?id=RkqYJw5TMD7)

FPA Attack on DANN for CIFAR10

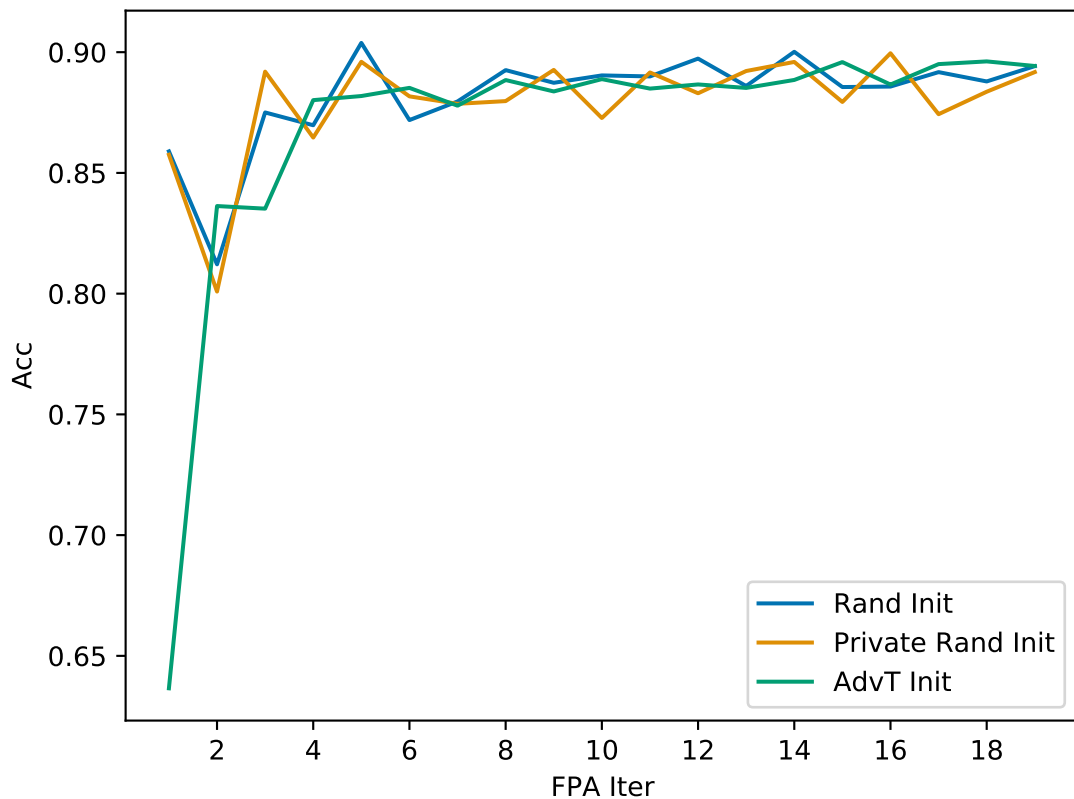

Supplement: supplementary_material [file attachment]

Transfer Attack for CIFAR10c (Level of Severity = 2)

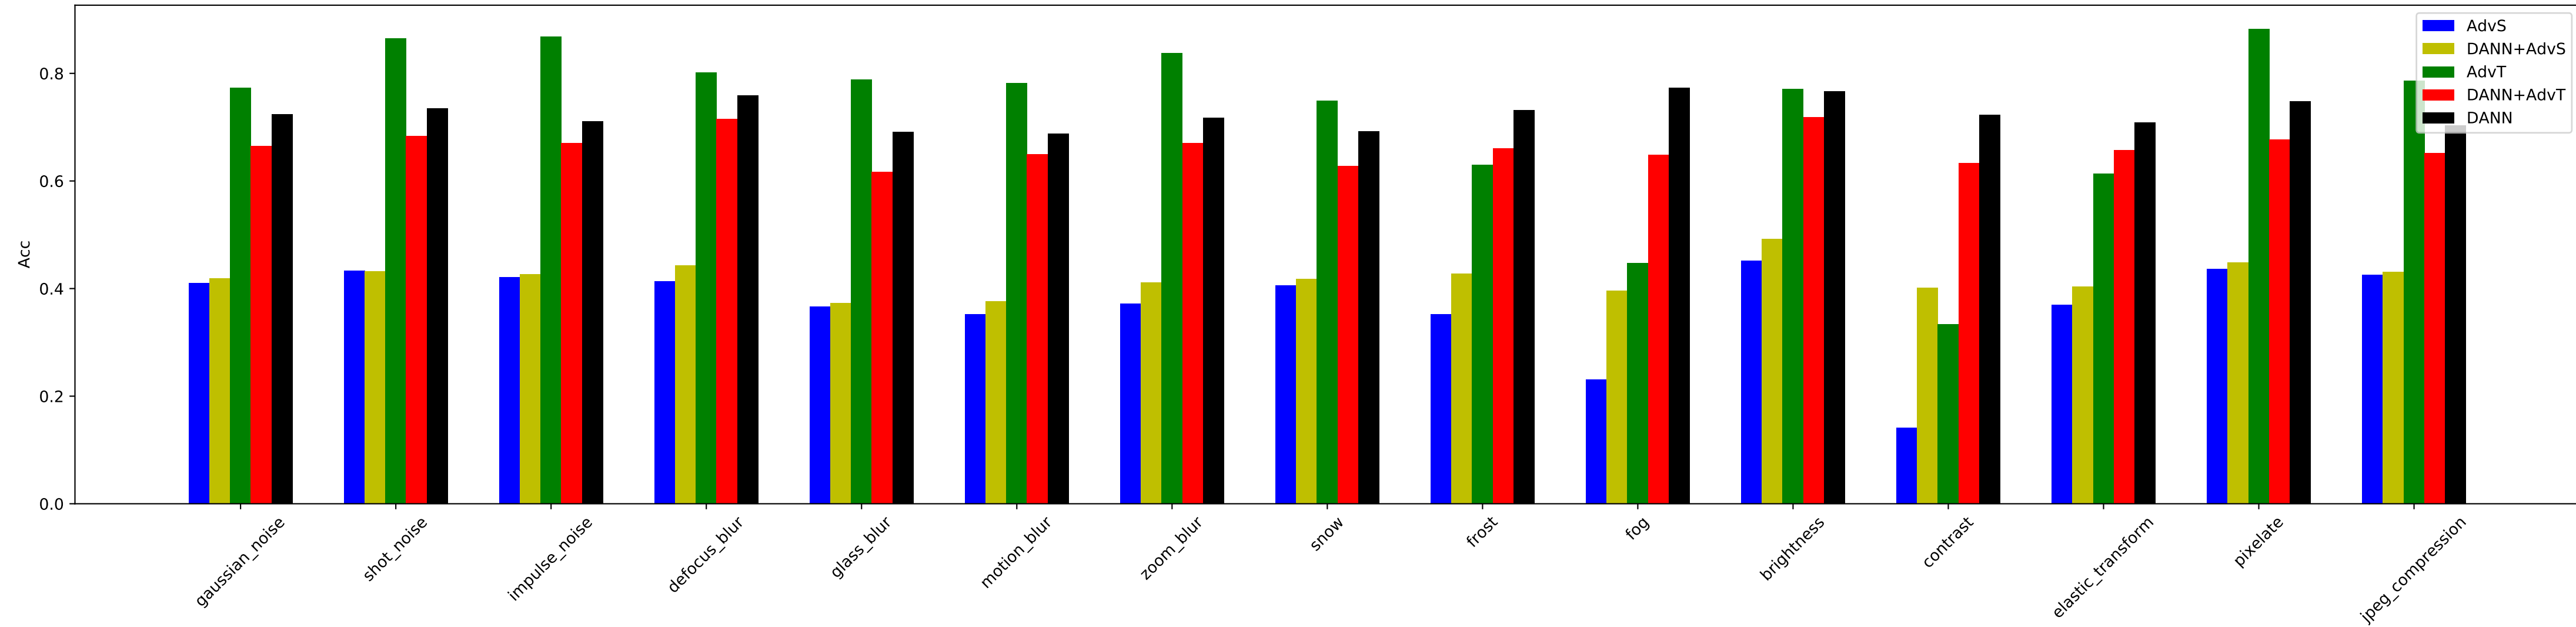

Supplement: supplementary_material [file attachment]

Effect of Target Size of DANN for CIFAR10  $\rightarrow$  CIFAR10-adv

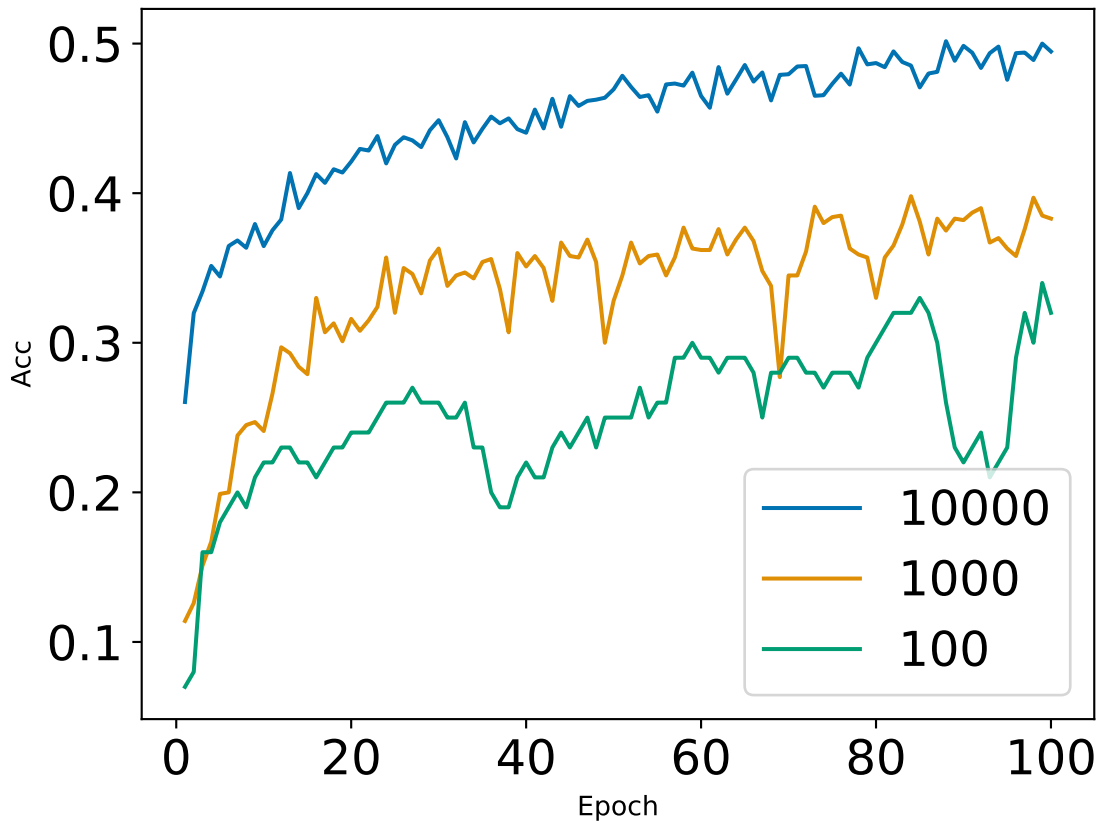

Supplement: supplementary_material [file attachment]

Transfer Attack for CIFAR10c (Level of Severity = 4)

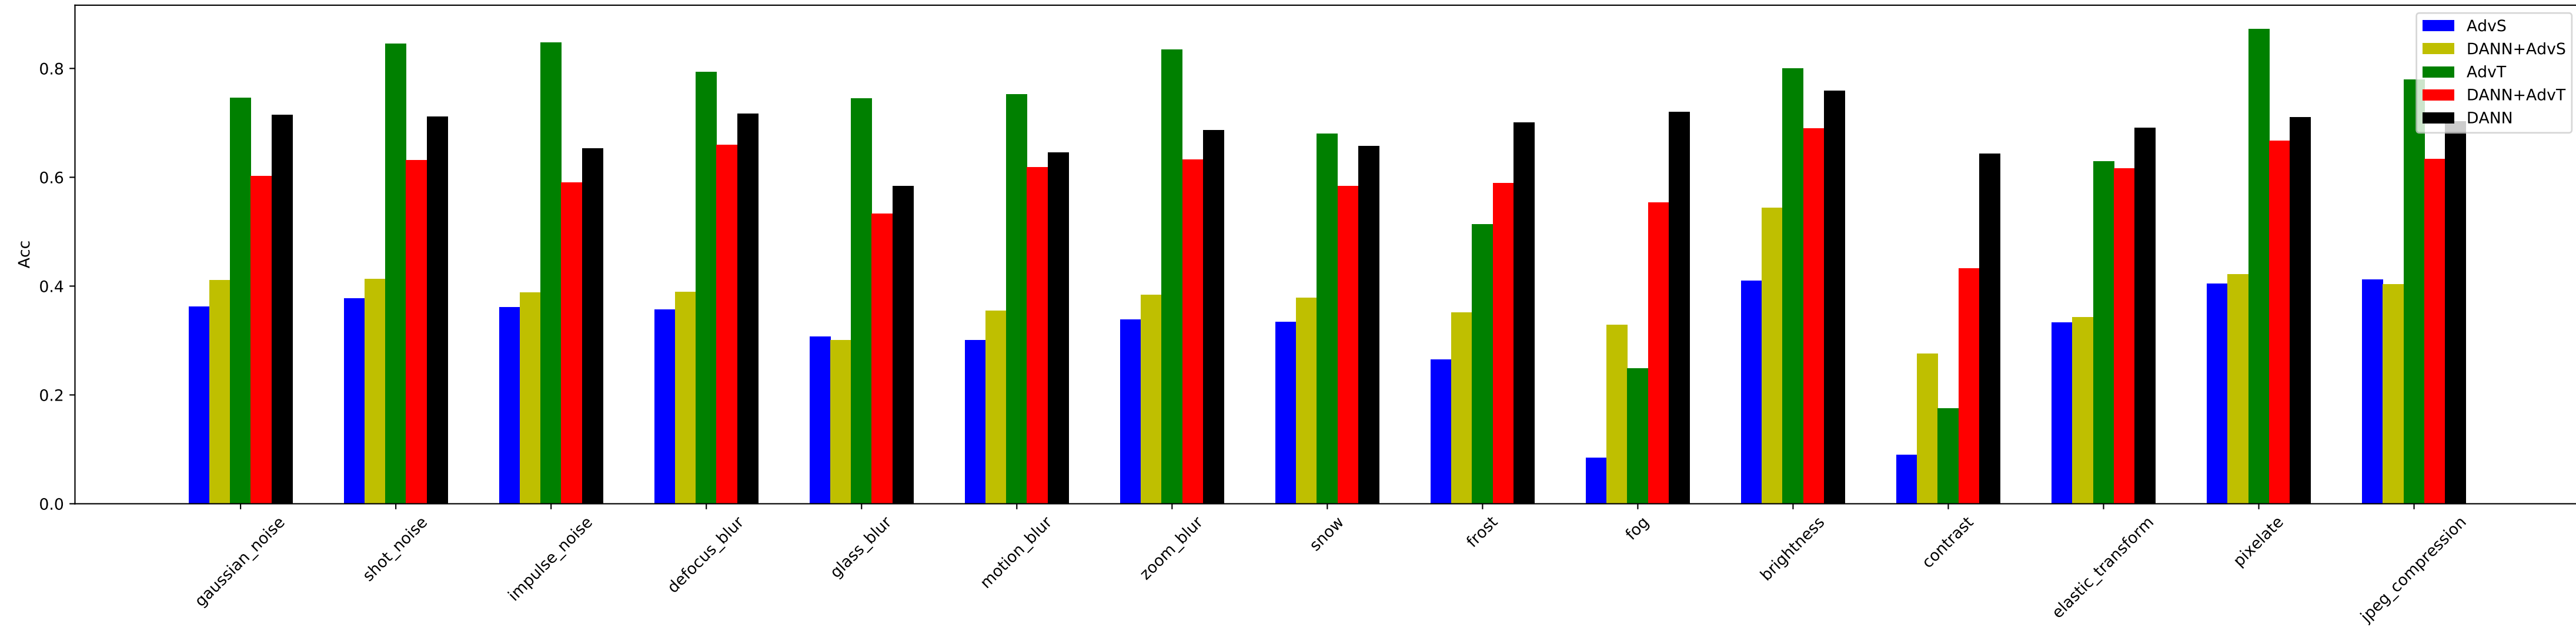

Supplement: supplementary_material [file attachment]

FPA Attack on DANN for CIFAR10  $\rightarrow$  CIFAR10c-Fog

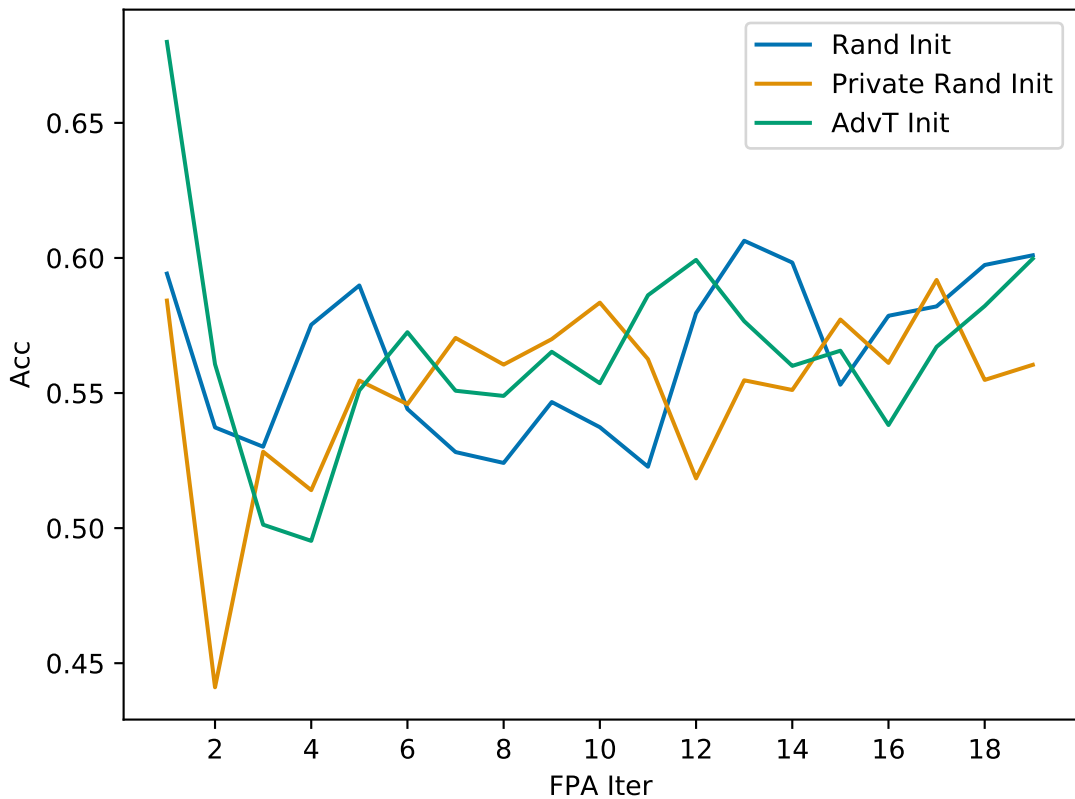

Supplement: supplementary_material [file attachment]

Transfer Attack for CIFAR10c (Level of Severity = 3)

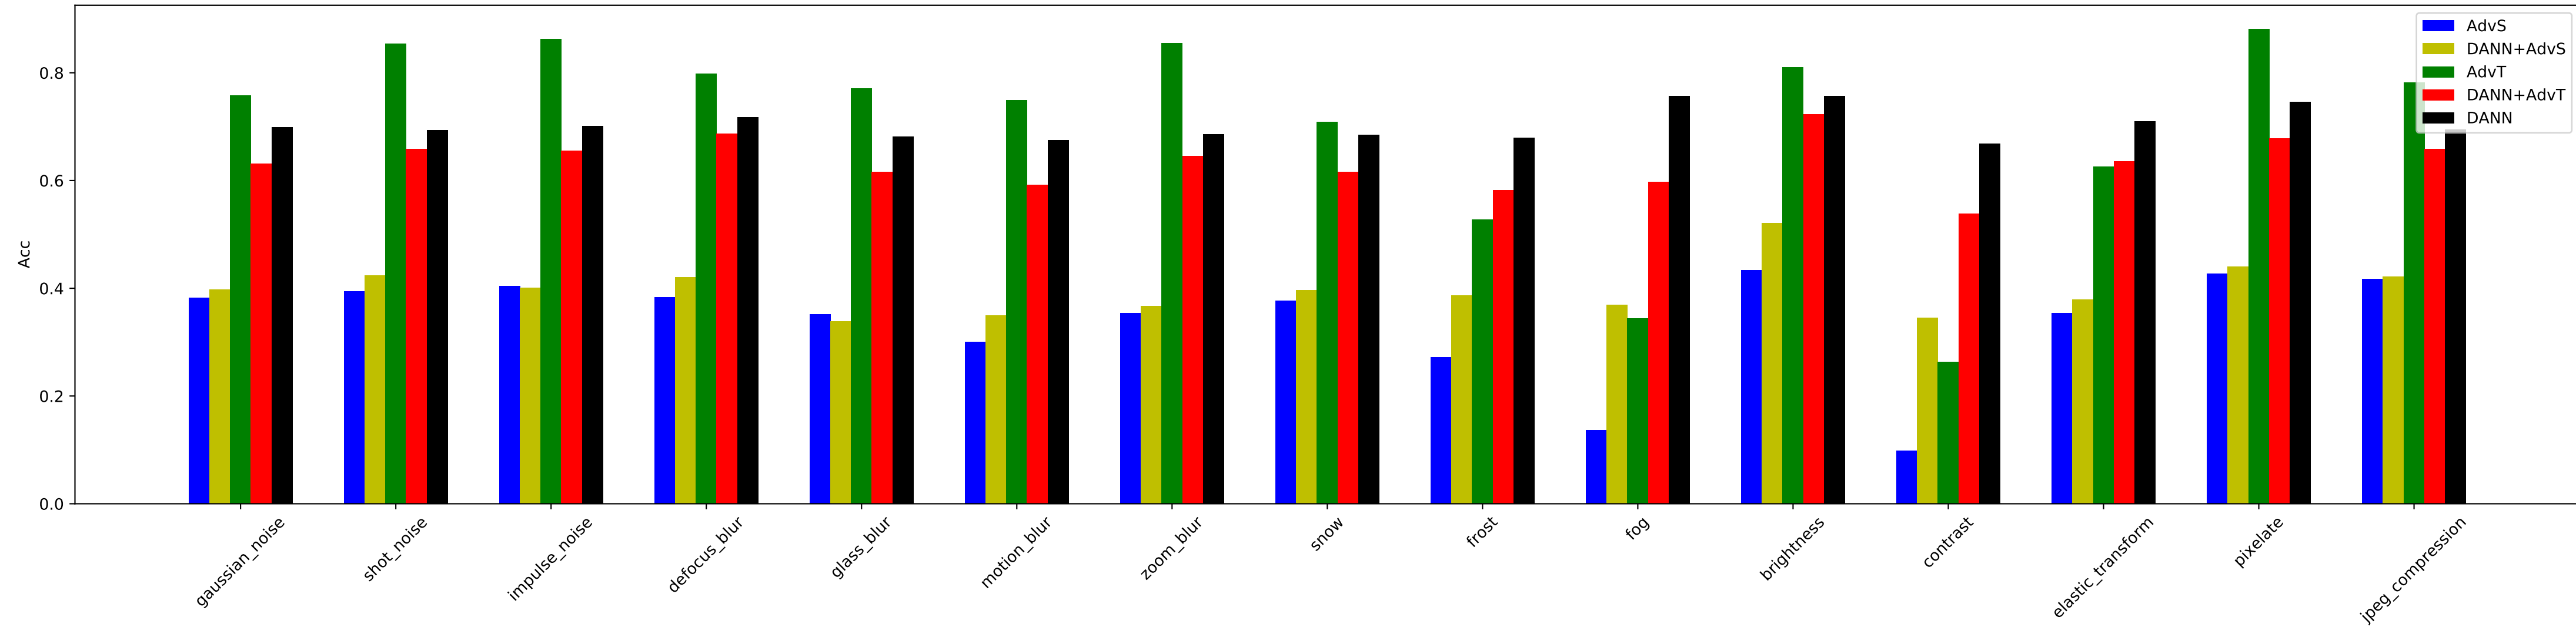

Supplement: supplementary_material [file attachment]

FPA Attack on DANN for CIFAR10

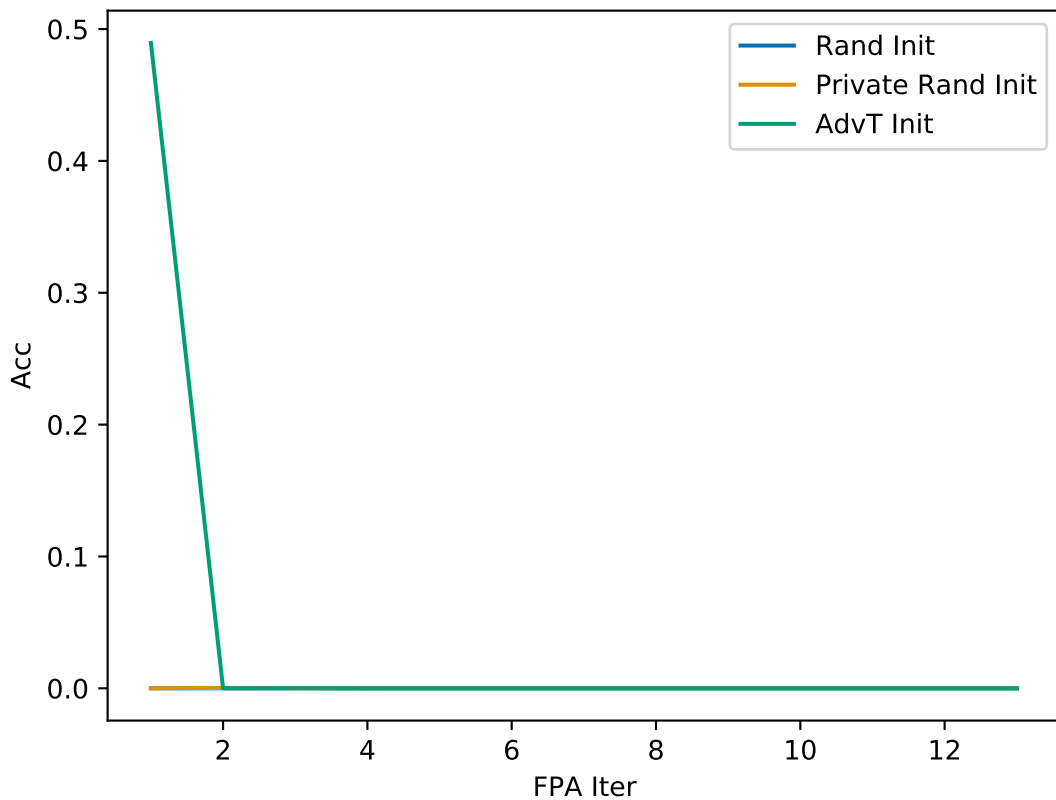

Supplement: supplementary_material [file attachment]

Transfer Attack for CIFAR10c (Level of Severity = 1)

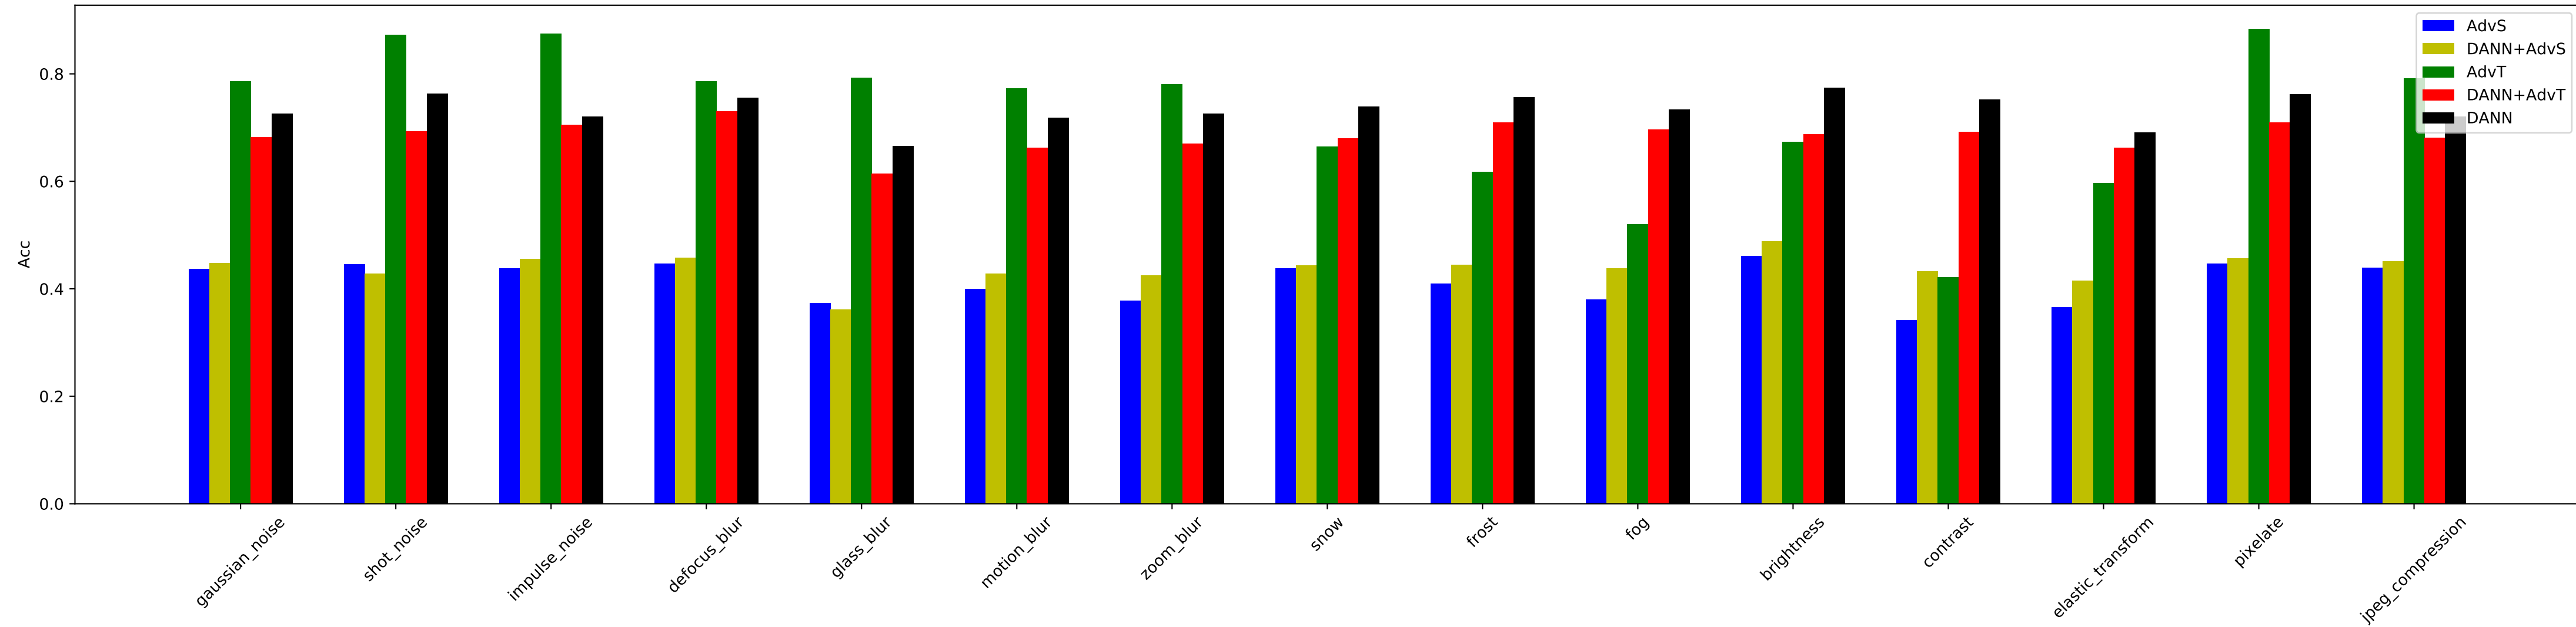

Supplement: supplementary_material [file attachment]

Alternating Bilevel Optimizaion Attack on DANN for CIFAR10  $\rightarrow$  CIFAR10c-Fog

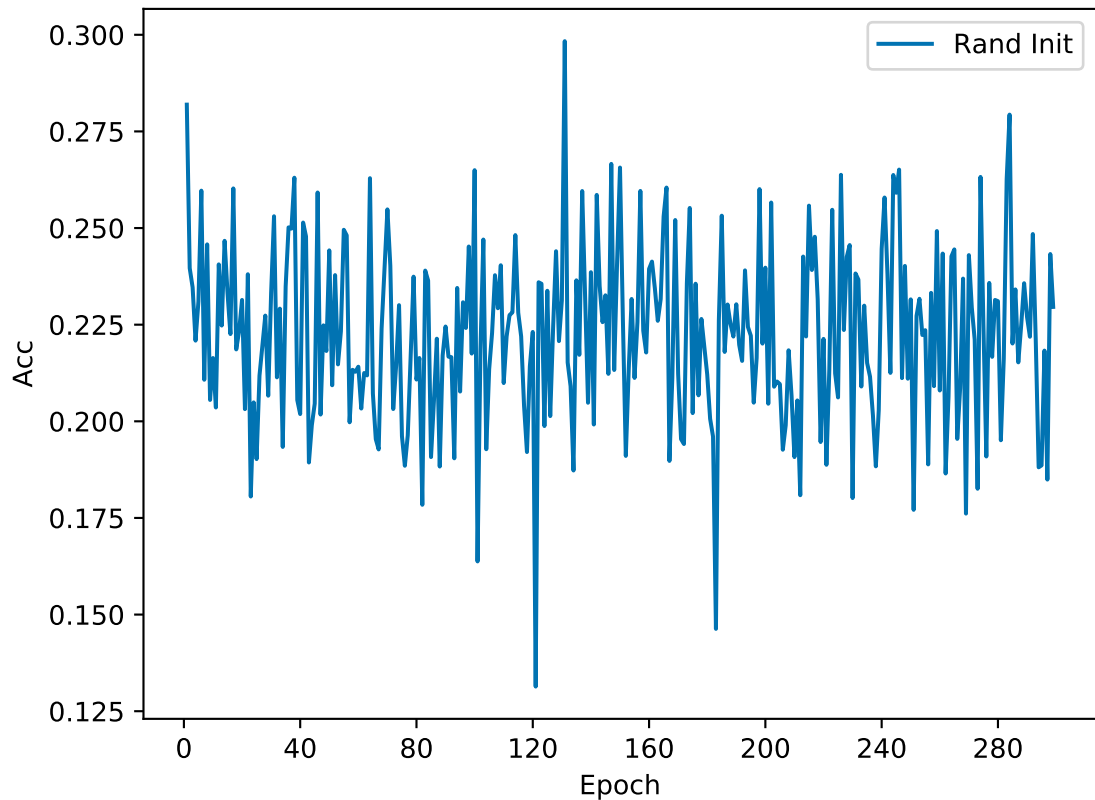

Supplement: supplementary_material [file attachment]

Transfer Attack for CIFAR10c (Level of Severity = 5)

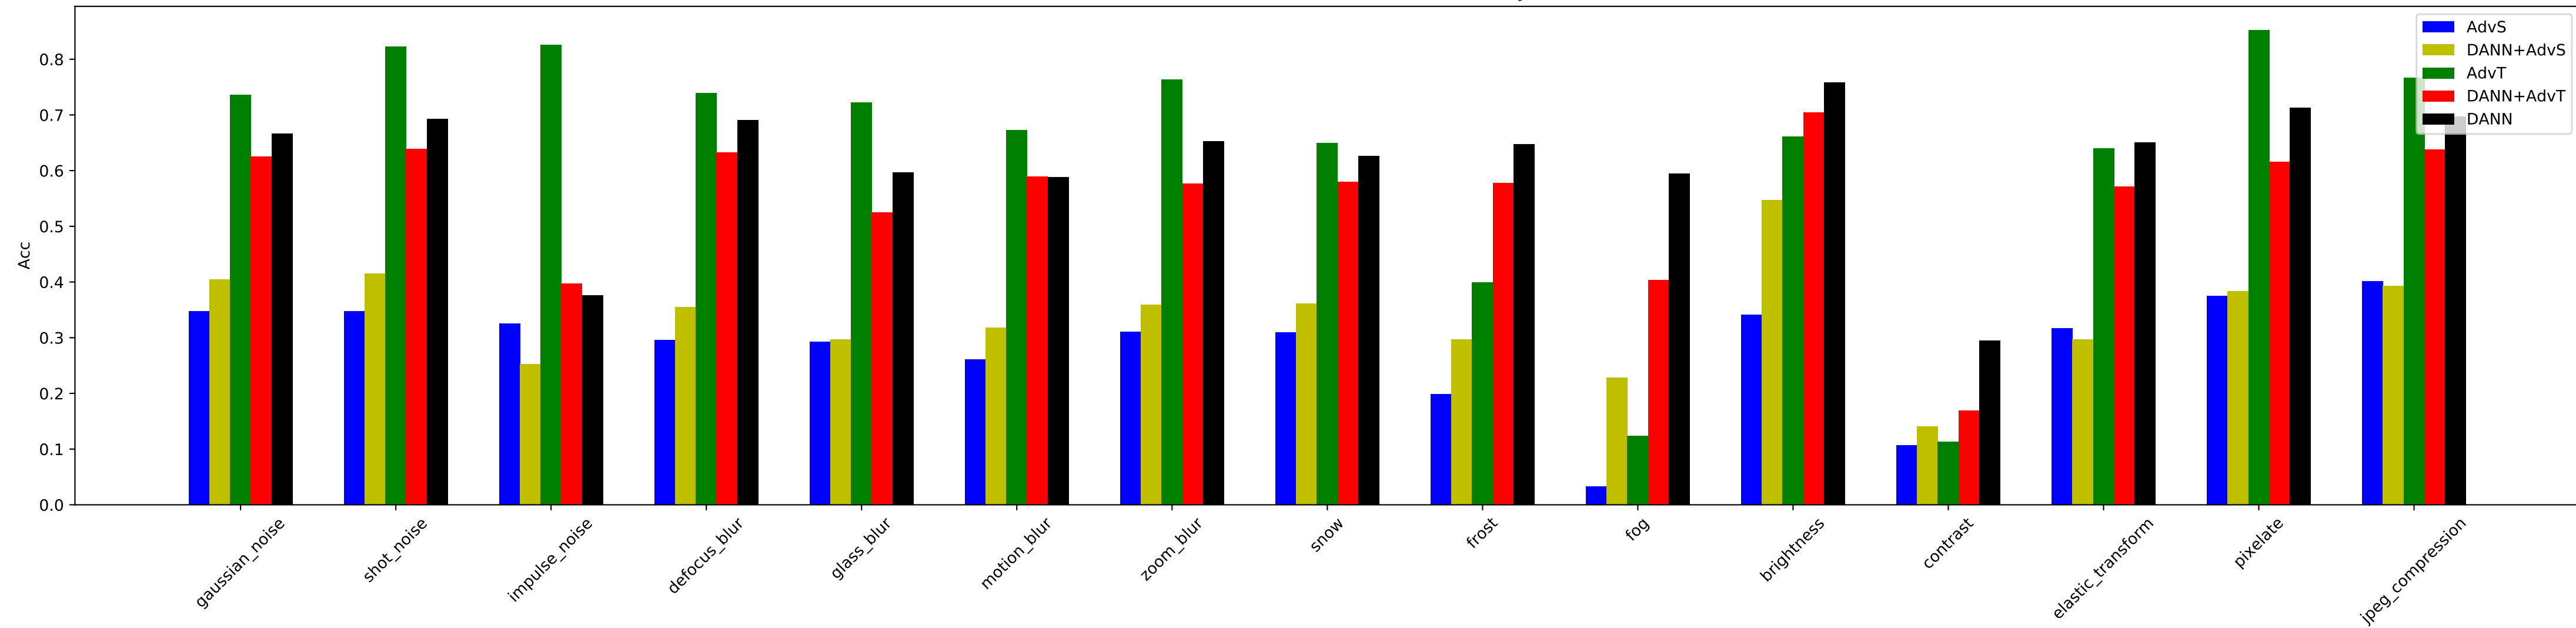

Supplement: supplementary_material [file attachment]

FPA Attack on DANN for CIFAR10  $\rightarrow$  CIFAR10c-Fog

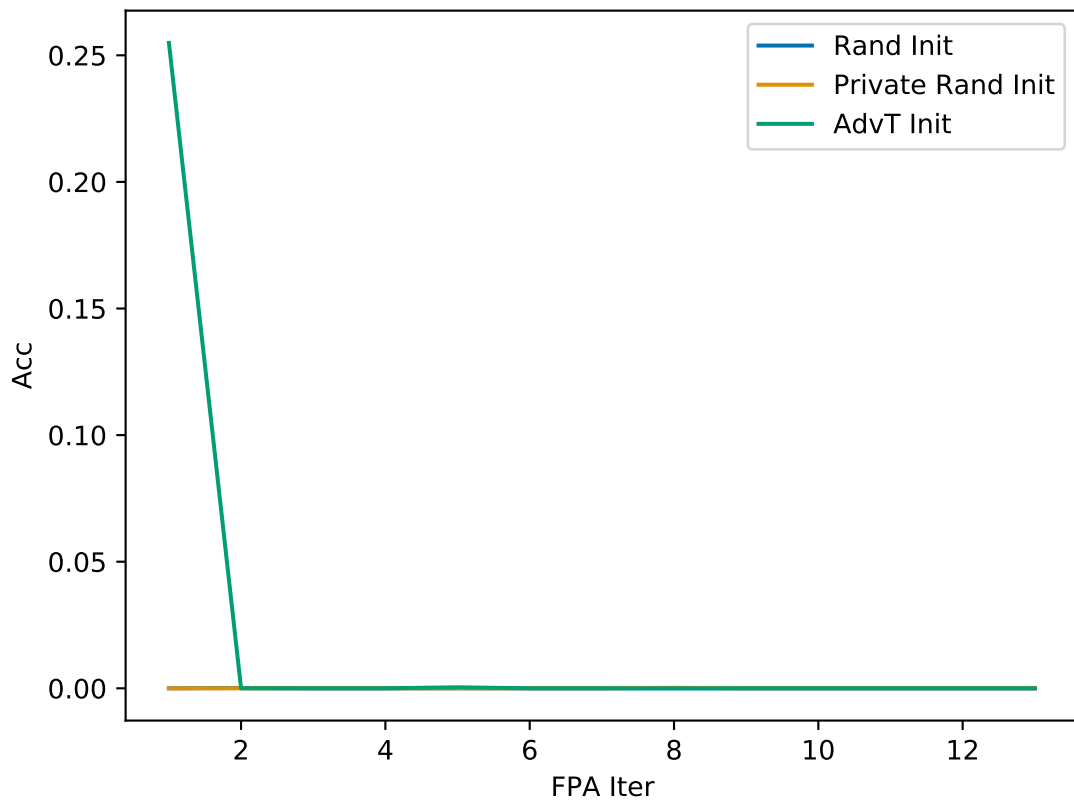

Supplement: supplementary_material [file attachment]
